# Supplementary material for: Bandgap tuning strategy by cations and halide ions of lead halide perovskites learned from machine learning
Source: Royal Society of Chemistry journal article supplement (doi:10.1039/d1ra03117a), 2021-01-01
Supplement: d1ra03117a1.pdf [file d1ra03117a1.pdf]

## Supporting information

### Bandgap Tuning Strategy by Cations and Halide Ions of lead Halide Perovskites Learned from Machine Learning

Yaoyao Li<sup>#a,b</sup>, Yao Lu<sup>#a,b</sup>, Xiaomin Huo<sup>a,b</sup>, Juan Meng<sup>a,b</sup>, Jie Dong<sup>a,b</sup>, Bo Qiao<sup>a,b</sup>, Suling Zhao<sup>a,b</sup>, Dong Wei<sup>c</sup>, Zheng Xu<sup>\*a,b</sup>, Dandan Song<sup>\*a,b</sup>

a Key Laboratory of Luminescence and Optical Information, Beijing Jiaotong University, Ministry of Education, Beijing 100044, China

b Institute of Optoelectronics Technology, Beijing Jiaotong University, Beijing 100044, China

c College of Physics and Energy, Fujian Normal University, Fuzhou, 350117, China.

#### 1. Machine learning data and results

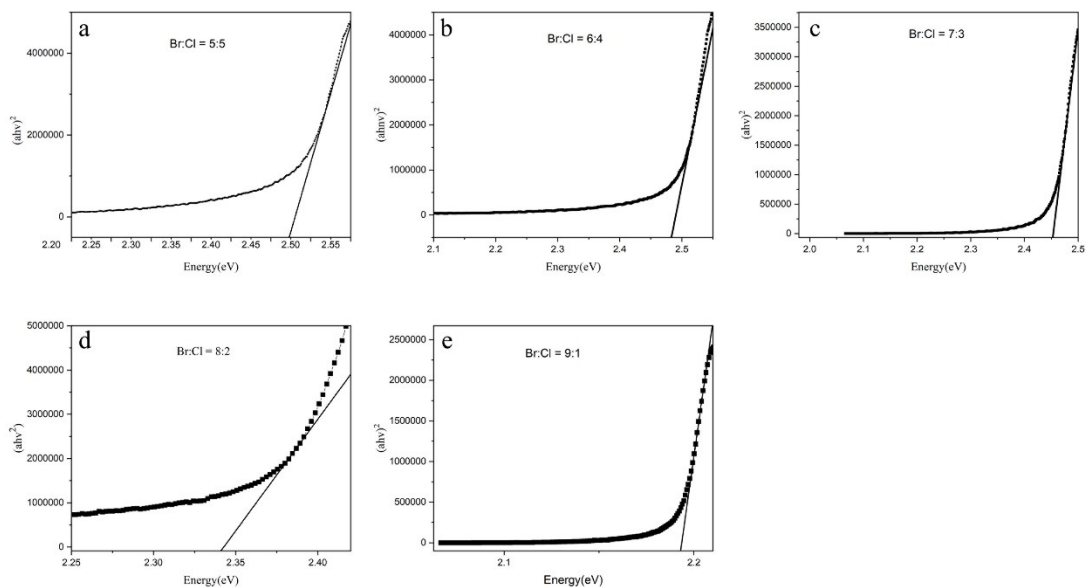

Fig. S1 Bandgaps of  $\text{CsPb}(\text{Cl}_x\text{Br}_{1-x})_3$  ( $x=0.1-0.5$ ) determined from their absorption profiles

Table S1 The compositions and the experimental bandgap values of the perovskites from literatures and our experiments (shown in Fig. S1). Some halide compositions in the literatures were normalized to make them fit the formula  $\text{MA}_{(1-a-b)}\text{FA}_a\text{Cs}_b\text{Pb}(\text{Cl}_{(1-x-y)}\text{Br}_x\text{I}_y)_3$ .<sup>a</sup>

---

| ID | MA   | FA   | Cs   | Cl   | Br   | I    | Bandgap | Ref |
|----|------|------|------|------|------|------|---------|-----|
| 1  | 1.00 | 0.00 | 0.00 | 0.00 | 0.00 | 1.00 | 1.60    | 1   |
| 2  | 0.70 | 0.20 | 0.10 | 0.00 | 0.00 | 1.00 | 1.56    | 2   |
| 3  | 0.50 | 0.40 | 0.10 | 0.00 | 0.00 | 1.00 | 1.54    | 2   |
| 4  | 0.40 | 0.50 | 0.10 | 0.00 | 0.00 | 1.00 | 1.52    | 2   |
| 5  | 0.25 | 0.75 | 0.00 | 0.00 | 0.00 | 1.00 | 1.55    | 3   |
| 6  | 0.20 | 0.70 | 0.10 | 0.00 | 0.00 | 1.00 | 1.49    | 2   |
| 7  | 0.17 | 0.83 | 0.00 | 0.00 | 0.00 | 1.00 | 1.53    | 4   |
| 8  | 0.00 | 0.80 | 0.20 | 0.00 | 0.00 | 1.00 | 1.57    | 5   |
| 9  | 0.00 | 0.83 | 0.17 | 0.00 | 0.00 | 1.00 | 1.56    | 6   |
| 10 | 0.00 | 0.85 | 0.15 | 0.00 | 0.00 | 1.00 | 1.54    | 7   |
| 11 | 0.00 | 0.90 | 0.10 | 0.00 | 0.00 | 1.00 | 1.53    | 7   |
| 12 | 0.00 | 0.95 | 0.05 | 0.00 | 0.00 | 1.00 | 1.52    | 8   |
| 13 | 0.00 | 1.00 | 0.00 | 0.00 | 0.00 | 1.00 | 1.48    | 9   |
| 14 | 0.15 | 0.85 | 0.00 | 0.00 | 0.05 | 0.95 | 1.54    | 10  |
| 15 | 0.00 | 0.80 | 0.20 | 0.00 | 0.06 | 0.94 | 1.58    | 11  |
| 16 | 1.00 | 0.00 | 0.00 | 0.00 | 0.07 | 0.93 | 1.68    | 12  |
| 17 | 1.00 | 0.00 | 0.00 | 0.00 | 0.10 | 0.90 | 1.61    | 13  |
| 18 | 0.15 | 0.85 | 0.00 | 0.00 | 0.10 | 0.90 | 1.57    | 10  |
| 19 | 0.10 | 0.85 | 0.05 | 0.00 | 0.10 | 0.90 | 1.55    | 14  |
| 20 | 0.05 | 0.85 | 0.10 | 0.00 | 0.10 | 0.90 | 1.57    | 14  |
| 21 | 0.05 | 0.90 | 0.05 | 0.00 | 0.10 | 0.90 | 1.52    | 14  |
| 22 | 0.00 | 0.90 | 0.10 | 0.00 | 0.10 | 0.90 | 1.53    | 14  |
| 23 | 0.00 | 0.95 | 0.05 | 0.00 | 0.10 | 0.90 | 1.48    | 14  |
| 24 | 1.00 | 0.00 | 0.00 | 0.00 | 0.12 | 0.88 | 1.62    | 15  |
| 25 | 0.12 | 0.83 | 0.05 | 0.00 | 0.13 | 0.87 | 1.60    | 16  |
| 26 | 0.15 | 0.79 | 0.06 | 0.00 | 0.15 | 0.85 | 1.75    | 17  |
| 27 | 0.14 | 0.81 | 0.05 | 0.00 | 0.15 | 0.85 | 1.61    | 18  |
| 28 | 0.13 | 0.76 | 0.10 | 0.00 | 0.15 | 0.85 | 1.61    | 18  |

---

---

|    |      |      |      |      |      |      |      |    |
|----|------|------|------|------|------|------|------|----|
| 29 | 0.16 | 0.79 | 0.05 | 0.00 | 0.17 | 0.83 | 1.60 | 12 |
| 30 | 0.15 | 0.75 | 0.10 | 0.00 | 0.17 | 0.83 | 1.50 | 19 |
| 31 | 0.10 | 0.40 | 0.50 | 0.00 | 0.17 | 0.83 | 1.69 | 20 |
| 32 | 0.00 | 0.50 | 0.50 | 0.00 | 0.17 | 0.83 | 1.62 | 20 |
| 33 | 0.00 | 0.83 | 0.17 | 0.00 | 0.17 | 0.83 | 1.65 | 6  |
| 34 | 1.00 | 0.00 | 0.00 | 0.00 | 0.20 | 0.80 | 1.72 | 21 |
| 35 | 0.70 | 0.30 | 0.00 | 0.00 | 0.20 | 0.80 | 1.69 | 22 |
| 36 | 0.20 | 0.80 | 0.00 | 0.00 | 0.20 | 0.80 | 1.63 | 10 |
| 37 | 0.16 | 0.79 | 0.06 | 0.00 | 0.22 | 0.78 | 1.60 | 19 |
| 38 | 0.25 | 0.75 | 0.00 | 0.00 | 0.25 | 0.75 | 1.66 | 10 |
| 39 | 0.15 | 0.85 | 0.00 | 0.00 | 0.25 | 0.75 | 1.65 | 10 |
| 40 | 1.00 | 0.00 | 0.00 | 0.00 | 0.27 | 0.73 | 1.75 | 23 |
| 41 | 0.00 | 0.17 | 0.83 | 0.00 | 0.27 | 0.73 | 1.72 | 24 |
| 42 | 0.00 | 0.15 | 0.85 | 0.00 | 0.27 | 0.73 | 1.72 | 23 |
| 43 | 1.00 | 0.00 | 0.00 | 0.00 | 0.30 | 0.70 | 1.77 | 25 |
| 44 | 0.30 | 0.70 | 0.00 | 0.00 | 0.30 | 0.70 | 1.70 | 10 |
| 45 | 0.15 | 0.85 | 0.00 | 0.00 | 0.30 | 0.70 | 1.68 | 10 |
| 46 | 0.00 | 0.60 | 0.40 | 0.00 | 0.30 | 0.70 | 1.75 | 26 |
| 47 | 0.00 | 0.80 | 0.20 | 0.00 | 0.30 | 0.70 | 1.75 | 27 |
| 48 | 0.00 | 0.00 | 1    | 0.00 | 0.33 | 0.67 | 1.92 | 28 |
| 49 | 0.00 | 0.83 | 0.17 | 0.00 | 0.33 | 0.67 | 1.74 | 6  |
| 50 | 1.00 | 0.00 | 0.00 | 0.00 | 0.33 | 0.67 | 1.75 | 12 |
| 51 | 0.35 | 0.65 | 0.00 | 0.00 | 0.35 | 0.65 | 1.74 | 10 |
| 52 | 0.15 | 0.85 | 0.00 | 0.00 | 0.35 | 0.65 | 1.71 | 10 |
| 53 | 0.90 | 0.00 | 0.10 | 0.00 | 0.40 | 0.60 | 1.80 | 29 |
| 54 | 0.60 | 0.40 | 0.00 | 0.00 | 0.40 | 0.60 | 1.76 | 30 |
| 55 | 0.40 | 0.60 | 0.00 | 0.00 | 0.40 | 0.60 | 1.76 | 8  |
| 56 | 0.40 | 0.00 | 0.60 | 0.00 | 0.40 | 0.60 | 1.75 | 30 |
| 57 | 0.15 | 0.74 | 0.11 | 0.00 | 0.40 | 0.60 | 1.78 | 31 |

---

---

|    |      |      |      |      |      |      |      |    |
|----|------|------|------|------|------|------|------|----|
| 58 | 0.00 | 0.40 | 0.60 | 0.00 | 0.40 | 0.60 | 1.76 | 30 |
| 59 | 0.00 | 0.83 | 0.17 | 0.00 | 0.40 | 0.60 | 1.74 | 32 |
| 60 | 1.00 | 0.00 | 0.00 | 0.00 | 0.42 | 0.58 | 1.79 | 15 |
| 61 | 0.45 | 0.55 | 0.00 | 0.00 | 0.45 | 0.55 | 1.81 | 10 |
| 62 | 0.15 | 0.85 | 0.00 | 0.00 | 0.45 | 0.55 | 1.79 | 10 |
| 63 | 1.00 | 0.00 | 0.00 | 0.00 | 0.50 | 0.50 | 1.90 | 33 |
| 64 | 0.50 | 0.50 | 0.00 | 0.00 | 0.50 | 0.50 | 1.85 | 10 |
| 65 | 0.17 | 0.83 | 0.00 | 0.00 | 0.50 | 0.50 | 1.80 | 34 |
| 66 | 0.16 | 0.79 | 0.05 | 0.00 | 0.40 | 0.60 | 1.80 | 35 |
| 67 | 0.00 | 0.00 | 1.00 | 0.00 | 0.50 | 0.50 | 2.10 | 36 |
| 68 | 0.00 | 0.83 | 0.17 | 0.00 | 0.50 | 0.50 | 1.80 | 12 |
| 69 | 1.00 | 0.00 | 0.00 | 0.00 | 0.59 | 0.41 | 1.96 | 15 |
| 70 | 0.15 | 0.79 | 0.06 | 0.00 | 0.60 | 0.40 | 1.78 | 17 |
| 71 | 0.15 | 0.85 | 0.00 | 0.00 | 0.60 | 0.40 | 1.76 | 10 |
| 72 | 0.00 | 0.87 | 0.13 | 0.00 | 0.60 | 0.40 | 1.93 | 24 |
| 73 | 1.00 | 0.00 | 0.00 | 0.00 | 0.67 | 0.33 | 1.98 | 37 |
| 74 | 0.00 | 0.83 | 0.17 | 0.00 | 0.67 | 0.33 | 1.96 | 6  |
| 75 | 0.00 | 0.00 | 1.00 | 0.00 | 0.67 | 0.33 | 2.05 | 38 |
| 76 | 0.00 | 0.85 | 0.15 | 0.00 | 0.70 | 0.30 | 2.00 | 39 |
| 77 | 0.00 | 1.00 | 0.00 | 0.00 | 0.90 | 0.10 | 1.97 | 40 |
| 78 | 1.00 | 0.00 | 0.00 | 0.00 | 0.72 | 0.28 | 2.01 | 15 |
| 79 | 0.00 | 0.83 | 0.17 | 0.00 | 0.83 | 0.17 | 2.07 | 6  |
| 80 | 0.15 | 0.85 | 0.00 | 0.00 | 0.85 | 0.15 | 1.60 | 41 |
| 81 | 1.00 | 0.00 | 0.00 | 0.00 | 0.95 | 0.05 | 2.23 | 15 |
| 82 | 1.00 | 0.00 | 0.00 | 0.00 | 1.00 | 0.00 | 2.30 | 42 |
| 83 | 1.00 | 0.00 | 0.00 | 0.20 | 0.80 | 0.00 | 2.55 | 43 |
| 84 | 1.00 | 0.00 | 0.00 | 0.40 | 0.60 | 0.00 | 2.69 | 43 |
| 85 | 1.00 | 0.00 | 0.00 | 0.60 | 0.40 | 0.00 | 2.84 | 43 |
| 86 | 1.00 | 0.00 | 0.00 | 0.80 | 0.20 | 0.00 | 2.98 | 43 |

---



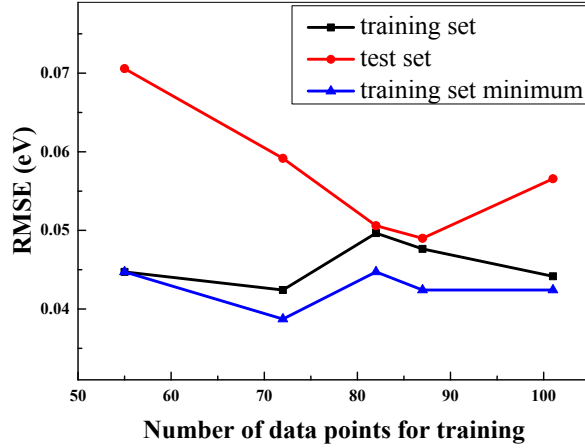

Fig. S2 The dependence of RMSE on the number of data points for training using NN algorithm. The RMSE values of training set and test set are obtained in the condition of the minimum RMSE on test set. The RMSE values of training set minimum represent for the minimum RMSE obtained by on the training set.

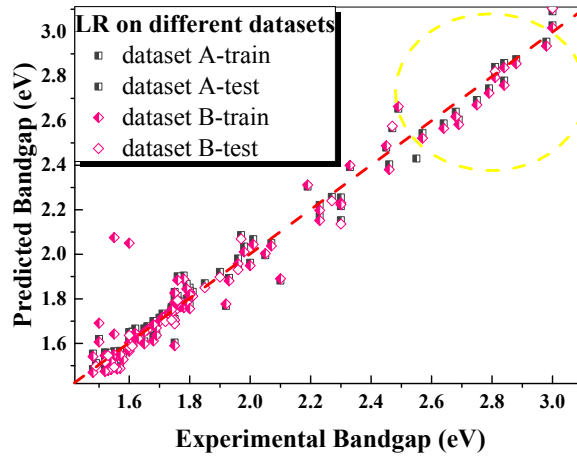

Fig.S3 Comparison of the performance of linear regression algorithm on different datasets. The red dash line presents the condition in which the predicted value equals to the experimental value.

Dataset A includes all the data points listed in Table S1, while dataset B includes dataset A and three additional data points ( $\text{MAPb}(\text{Cl}_{0.05}\text{I}_{0.95})_3$  ( $E_g=1.55\text{eV}^{50}$ ),  $\text{MAPb}(\text{Cl}_{0.33}\text{I}_{0.67})_3$  ( $E_g=1.55\text{eV}^{51}$ ),

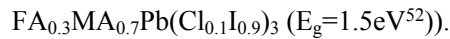

Table S2 Importance of the input features presented by different algorithms

| Input feature | RF                               | LR                          |
|---------------|----------------------------------|-----------------------------|
|               | % increase in mean squared error | Coefficient in equation (1) |
| FA            | 22.1                             | -0.102                      |

|    |      |        |
|----|------|--------|
| Cs | 12.8 | -0.039 |
| Br | 19.6 | 0.669  |
| Cl | 36.6 | 1.543  |

## 2. Prediction results by neuronal network algorithm

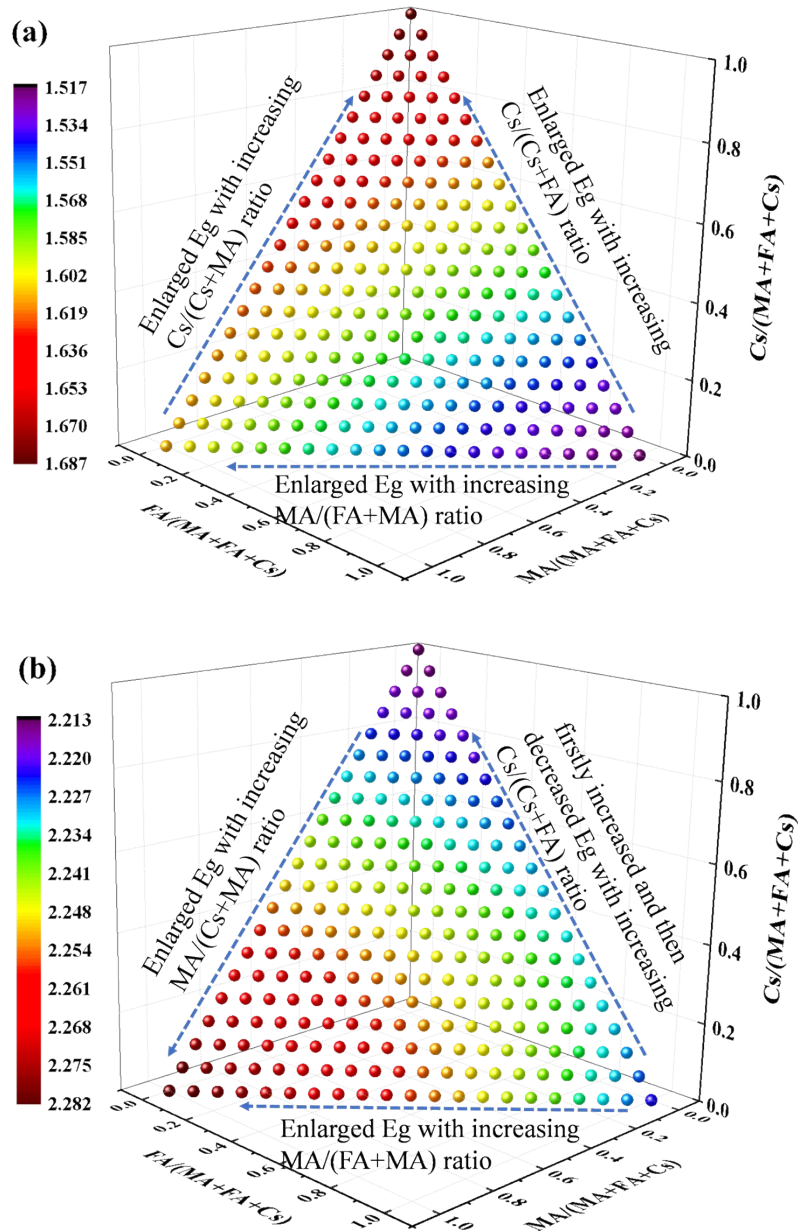

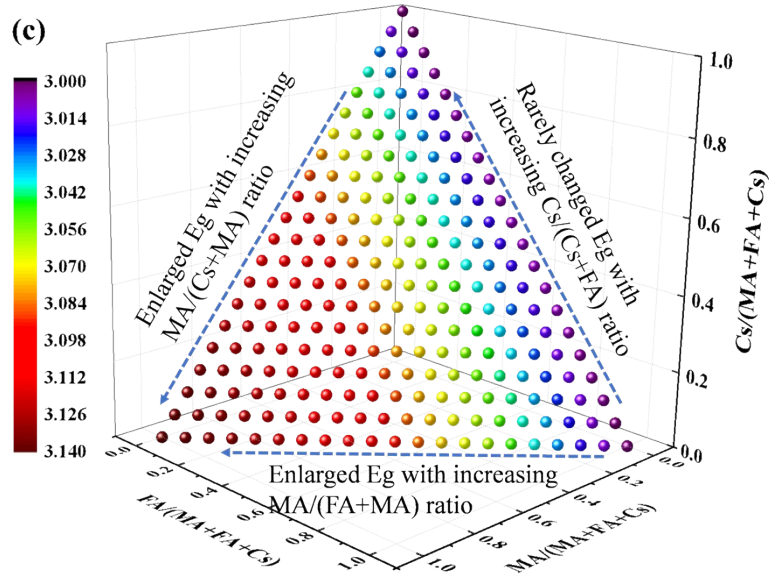

Fig. S5 4D plots of the predicted bandgap (unit: eV) of  $\text{Cs}_a\text{FA}_b\text{MA}_{(1-a-b)}\text{PbX}_3$ ,  $X=\text{I}, \text{Br}$  and  $\text{Cl}$ , respectively, with different cation ratios by neutral net algorithm trained by the experimental data listed in Table S1.

Table S3 The compositions of the  $\text{FACsPb}(\text{Cl}_{(0.2-x)}\text{Br}_x\text{I}_{0.8})_3$  perovskites with the predicted bandgaps of 1.650-1.710 eV and 1.780-1.840 eV by neutral net algorithm trained by the experimental data listed in Table S1.

| Bandgap | FA/(FA+MA+Cs) | Cs/(FA+MA+Cs) | Br/(Cl+Br+I) | Cl/(Cl+Br+I) |
|---------|---------------|---------------|--------------|--------------|
| 1.784   | 0             | 1             |              |              |
| 1.651   | 0.7           | 0.3           | 0.20         | 0            |
| 1.827   | 0             | 1             |              |              |
| 1.818   | 0.05          | 0.95          |              |              |
| 1.808   | 0.1           | 0.9           |              |              |
| 1.798   | 0.15          | 0.85          |              |              |
| 1.788   | 0.2           | 0.8           |              |              |
| 1.697   | 0.7           | 0.3           | 0.15         | 0.05         |
| 1.688   | 0.75          | 0.25          |              |              |
| 1.680   | 0.8           | 0.2           |              |              |
| 1.672   | 0.85          | 0.15          |              |              |
| 1.664   | 0.9           | 0.1           |              |              |
| 1.657   | 0.95          | 0.05          |              |              |
| 1.801   | 0.4           | 0.6           |              |              |
| 1.792   | 0.45          | 0.55          | 0.10         | 0.10         |
| 1.783   | 0.5           | 0.5           |              |              |
| 1.838   | 0.2           | 0.8           |              |              |



|       |      |      |
|-------|------|------|
| 1.828 | 0.25 | 0.75 |
| 1.819 | 0.3  | 0.7  |
| 1.699 | 0    | 1    |
| 1.810 | 0.35 | 0.65 |

**Table S4 Experimental and theoretical efficiencies of the TSCs based on perovskite**

| TSC type | Bottom cell | Theoretical efficiency limit and the optimized bandgap of perovskite | Perovskite bandgap | efficiency          |
|----------|-------------|----------------------------------------------------------------------|--------------------|---------------------|
| 4T       | Si          | 45.3% and 1.81 eV from detailed balance theory <sup>54</sup>         | 1.74               | 19.8 <sup>32</sup>  |
|          |             |                                                                      | 1.75               | 21.18 <sup>55</sup> |
|          |             |                                                                      | 1.63               | 28.2 <sup>56</sup>  |
|          |             |                                                                      | 1.72               | 27.1 <sup>57</sup>  |
|          |             |                                                                      | 1.63               | 26.4 <sup>58</sup>  |
|          | CIGS        | Similar to above                                                     | 1.55               | 25.2 <sup>59</sup>  |
|          |             |                                                                      | 1.6                | 20.7 <sup>60</sup>  |
|          |             |                                                                      | 1.62               | 23.9 <sup>61</sup>  |
|          |             |                                                                      | 1.68               | 25.9 <sup>62</sup>  |
|          |             |                                                                      | 1.75               | 23.4 <sup>61</sup>  |
| 2T       | Si          | 45.1% and 1.73 eV from detailed balance theory <sup>54</sup>         | 1.60               | 25.2 <sup>63</sup>  |
|          |             |                                                                      | 1.68               | 25.0 <sup>63</sup>  |
|          |             |                                                                      | 1.66               | 25.5 <sup>64</sup>  |
|          |             |                                                                      | 1.64               | 25.4 <sup>65</sup>  |
|          | CIGS        | Similar to above                                                     | 1.72               | 10.98 <sup>66</sup> |
|          |             |                                                                      | 1.59               | 22.43 <sup>67</sup> |

## Reference:

1. Z. Yang, A. Rajagopal, C. C. Chueh, S. B. Jo, B. Liu, T. Zhao and A. K. Jen, *Adv Mater*, 2016, **28**, 8990-8997.
2. H. Bhunia, S. Chatterjee and A. J. Pal, *ACS Applied Energy Materials*, 2018, **1**, 4351-4358.
3. L. K. Ono, E. J. Juarez-Perez and Y. Qi, *ACS Appl Mater Interfaces*, 2017, **9**, 30197-30246.
4. P. Brenner, T. Glöckler, D. Rueda-Delgado, T. Abzieher, M. Jakoby, B. S. Richards, U. W. Paetzold, I. A. Howard and U. Lemmer, *Optical Materials Express*, 2017, **7**.
5. Y. Yu, C. Wang, C. R. Grice, N. Shrestha, J. Chen, D. Zhao, W. Liao, A. J. Cimaroli, P. J. Roland, R. J. Ellingson and Y. Yan, *ChemSusChem*, 2016, **9**, 3288-3297.
6. S. Prathapani, P. Bhargava and S. Mallick, *Applied Physics Letters*, 2018, **112**.
7. P. Luo, S. Zhou, Y. Zhou, W. Xia, L. Sun, J. Cheng, C. Xu and Y. Lu, *ACS Appl Mater Interfaces*, 2017, **9**, 42708-42716.
8. F. Guo, S. Qiu, J. Hu, H. Wang, B. Cai, J. Li, X. Yuan, X. Liu, K. Forberich, C. J. Brabec and Y. Mai, *Adv Sci (Weinh)*, 2019, **6**, 1901067.
9. T. Liu, Y. Zhou, Z. Li, L. Zhang, M.-G. Ju, D. Luo, Y. Yang, M. Yang, D. H. Kim, W. Yang, N. P. Padture, M. C. Beard, X. C. Zeng, K. Zhu, Q. Gong and R. Zhu, *Advanced Energy Materials*, 2018, **8**.
10. X. Zhang, J. Liu, Z. Song, W. Zuo, Z. Fan, X. He, K. Luo, Q. Ye and C. Liao, *physica status solidi (a)*, 2019, **216**.
11. C. Yi, J. Luo, S. Meloni, A. Boziki, N. Ashari-Astani, C. Grätzel, S. M. Zakeeruddin, U. Röthlisberger and M. Grätzel, *Energy & Environmental Science*, 2016, **9**, 656-662.
12. T. Duong, Y. Wu, H. Shen, J. Peng, X. Fu, D. Jacobs, E.-C. Wang, T. C. Kho, K. C. Fong, M. Stocks, E. Franklin, A. Blakers, N. Zin, K. McIntosh, W. Li, Y.-B. Cheng, T. P. White, K. Weber and K. Catchpole, *Advanced Energy Materials*, 2017, **7**.
13. K. Cao, H. Li, S. Liu, J. Cui, Y. Shen and M. Wang, *Nanoscale*, 2016, **8**, 8839-8846.
14. L. Chen, Y. Y. Tan, Z. X. Chen, T. Wang, S. Hu, Z. A. Nan, L. Q. Xie, Y. Hui, J. X. Huang, C. Zhan, S. H. Wang, J. Z. Zhou, J. W. Yan, B. W. Mao and Z. Q. Tian, *J Am Chem Soc*, 2019, **141**, 1665-1671.
15. S. A. Kulkarni, T. Baikie, P. P. Boix, N. Yantara, N. Mathews and S. Mhaisalkar, *J. Mater. Chem. A*, 2014, **2**, 9221-9225.
16. M. M. Tavakoli, F. Giordano, S. M. Zakeeruddin and M. Gratzel, *Nano Lett*, 2018, **18**, 2428-2434.
17. M. Abdi-Jalebi, Z. Andaji-Garmaroudi, S. Cacovich, C. Stavrakas, B. Philippe, J. M. Richter, M. Alsari, E. P. Booker, E. M. Hutter, A. J. Pearson, S. Lilliu, T. J. Savenije, H. Rensmo, G. Divitini, C. Ducati, R. H. Friend and S. D. Stranks, *Nature*, 2018, **555**, 497-501.
18. M. Deepa, M. Salado, L. Calio, S. Kazim, S. M. Shivaprasad and S. Ahmad, *Phys Chem Chem Phys*, 2017, **19**, 4069-4077.
19. J. Cao, X. Lv, P. Zhang, T. T. Chuong, B. Wu, X. Feng, C. Shan, J. Liu and Y. Tang, *Adv Mater*, 2018, **30**, e1800568.
20. L. Gil-Escrig, C. Momblona, M.-G. La-Placa, P. P. Boix, M. Sessolo and H. J. Bolink, *Advanced Energy Materials*, 2018, **8**.
21. G. Longo, C. Momblona, M.-G. La-Placa, L. Gil-Escrig, M. Sessolo and H. J. Bolink, *ACS Energy Letters*, 2017, **3**, 214-219.
22. Z. Yang, C.-C. Chueh, P.-W. Liang, M. Crump, F. Lin, Z. Zhu and A. K. Y. Jen, *Nano Energy*,

- 2016, **22**, 328-337.
23. Y. Zhou, F. Wang, Y. Cao, J.-P. Wang, H.-H. Fang, M. A. Loi, N. Zhao and C.-P. Wong, *Advanced Energy Materials*, 2017, **7**.
24. Y. Zhou, Y.-H. Jia, H.-H. Fang, M. A. Loi, F.-Y. Xie, L. Gong, M.-C. Qin, X.-H. Lu, C.-P. Wong and N. Zhao, *Advanced Functional Materials*, 2018, **28**.
25. X. Tang, M. van den Berg, E. Gu, A. Horneber, G. J. Matt, A. Osvet, A. J. Meixner, D. Zhang and C. J. Brabec, *Nano Lett*, 2018, **18**, 2172-2178.
26. K. A. Bush, K. Frohna, R. Prasanna, R. E. Beal, T. Leijtens, S. A. Swifter and M. D. McGehee, *ACS Energy Letters*, 2018, **3**, 428-435.
27. Y. Yu, C. Wang, C. R. Grice, N. Shrestha, D. Zhao, W. Liao, L. Guan, R. A. Awni, W. Meng, A. J. Cimaroli, K. Zhu, R. J. Ellingson and Y. Yan, *ACS Energy Letters*, 2017, **2**, 1177-1182.
28. E. C. Shen, J. D. Chen, Y. Tian, Y. X. Luo, Y. Shen, Q. Sun, T. Y. Jin, G. Z. Shi, Y. Q. Li and J. X. Tang, *Adv Sci (Weinh)*, 2020, **7**, 1901952.
29. Y.-M. Xie, C. Ma, X. Xu, M. Li, Y. Ma, J. Wang, H. T. Chandran, C.-S. Lee and S.-W. Tsang, *Nano Research*, 2019, **12**, 1033-1039.
30. S. Chen, Y. Hou, H. Chen, X. Tang, S. Langner, N. Li, T. Stubhan, I. Levchuk, E. Gu, A. Osvet and C. J. Brabec, *Advanced Energy Materials*, 2018, **8**.
31. J. Cao, S. X. Tao, P. A. Bobbert, C. P. Wong and N. Zhao, *Adv Mater*, 2018, **30**, e1707350.
32. D. P. McMeekin, G. Sadoughi, W. Rehman, G. E. Eperon, M. Saliba, M. T. Horantner, A. Haghighirad, N. Sakai, L. Korte, B. Rech, M. B. Johnston, L. M. Herz and H. J. Snaith, *Science*, 2016, **351**, 151-155.
33. M. C. Brennan, S. Draguta, P. V. Kamat and M. Kuno, *ACS Energy Letters*, 2017, **3**, 204-213.
34. H. Hu, B. Dong and W. Zhang, *Journal of Materials Chemistry A*, 2017, **5**, 11436-11449.
35. A. Yi, S. Chae, H. Lee and H. J. Kim, *Journal of Materials Chemistry A*, 2019, **7**, 27267-27277.
36. H. Chung, S. I. Jung, H. J. Kim, W. Cha, E. Sim, D. Kim, W. K. Koh and J. Kim, *Angew Chem Int Ed Engl*, 2017, **56**, 4160-4164.
37. P. Sadhukhan, S. Kundu, A. Roy, A. Ray, P. Maji, H. Dutta, S. K. Pradhan and S. Das, *Crystal Growth & Design*, 2018, **18**, 3428-3432.
38. W. S. Subhani, K. Wang, M. Du, X. Wang and S. Liu, *Advanced Energy Materials*, 2019, **9**.
39. D. Forgács, D. Pérez-del-Rey, J. Ávila, C. Momblona, L. Gil-Escrig, B. Dänekamp, M. Sessolo and H. J. Bolink, *Journal of Materials Chemistry A*, 2017, **5**, 3203-3207.
40. G. E. Eperon, S. D. Stranks, C. Menelaou, M. B. Johnston, L. M. Herz and H. J. Snaith, *Energy & Environmental Science*, 2014, **7**.
41. I. Minda, J. Horn, E. Ahmed, D. Schlettwein and H. Schwoerer, *Chemphyschem*, 2018, **19**, 3010-3017.
42. J. M. Howard, R. Lahoti and M. S. Leite, *Advanced Energy Materials*, 2019, **10**.
43. R. Comin, G. Walters, E. S. Thibau, O. Voznyy, Z.-H. Lu and E. H. Sargent, *Journal of Materials Chemistry C*, 2015, **3**, 8839-8843.
44. P. Becker, J. A. Márquez, J. Just, A. Al-Ashouri, C. Hages, H. Hempel, M. Jošt, S. Albrecht, R. Frahm and T. Unold, *Advanced Energy Materials*, 2019, **9**.
45. J. Xue, D. Yang, B. Cai, X. Xu, J. Wang, H. Ma, X. Yu, G. Yuan, Y. Zou, J. Song and H. Zeng, *Advanced Functional Materials*, 2019, **29**.
46. Q. Zhang, R. Su, X. Liu, J. Xing, T. C. Sum and Q. Xiong, *Advanced Functional Materials*, 2016, **26**, 6238-6245.

47. J. Wang, J. Peng, Y. Sun, X. Liu, Y. Chen and Z. Liang, *Advanced Electronic Materials*, 2016, **2**.
48. N. K. Kumawat, A. Dey, A. Kumar, S. P. Gopinathan, K. L. Narasimhan and D. Kabra, *ACS Appl Mater Interfaces*, 2015, **7**, 13119-13124.
49. N. Kitazawa, Y. Watanabe and Y. Nakamura, *Journal of Materials Science*, 2002, **37**, 3585-3587.
50. W. Nie, H. Tsai, R. Asadpour, J. C. Blancon, A. J. Neukirch, G. Gupta, J. J. Crochet, M. Chhowalla, S. Tretiak, M. A. Alam, H. L. Wang and A. D. Mohite, *Science*, 2015, **347**, 522-525.
51. S. Sajid, A. M. Elseman, D. Wei, J. Ji, S. Dou, H. Huang, P. Cui and M. Li, *Nano Energy*, 2019, **55**, 470-476.
52. L. Chen, G. Wang, L. Niu, Y. Yao, Y. Guan, Y. Cui and Q. Song, *RSC Advances*, 2018, **8**, 15961-15966.
53. S. J. Clark, M. D. Segall, C. J. Pickard, P. J. Hasnip, M. I. J. Probert, K. Refson and M. C. Payne, *Zeitschrift für Kristallographie - Crystalline Materials*, 2005, **220**.
54. M. H. Futscher and B. Ehrler, *ACS Energy Letters*, 2016, **1**, 863-868.
55. F. J. Ramos, S. Jutteau, J. Posada, A. Bercegol, A. Rebai, T. Guillemot, R. Bodeux, N. Schneider, N. Loones, D. Ory, C. Broussillou, G. Goer, L. Lombez and J. Rousset, *Sci Rep*, 2018, **8**, 16139.
56. B. Chen, S.-W. Baek, Y. Hou, E. Aydin, M. De Bastiani, B. Scheffel, A. Proppe, Z. Huang, M. Wei, Y.-K. Wang, E.-H. Jung, T. G. Allen, E. Van Kerschaver, F. P. García de Arquer, M. I. Saidaminov, S. Hoogland, S. De Wolf and E. H. Sargent, *Nature Communications*, 2020, **11**, 1257.
57. M. Jaysankar, B. A. L. Raul, J. Bastos, C. Burgess, C. Weijtens, M. Creatore, T. Aernouts, Y. Kuang, R. Gehlhaar, A. Hadipour and J. Poortmans, *ACS Energy Letters*, 2019, **4**, 259-264.
58. T. Duong, Y. Wu, H. Shen, J. Peng, X. Fu, D. Jacobs, E.-C. Wang, T. C. Kho, K. C. Fong, M. Stocks, E. Franklin, A. Blakers, N. Zin, K. McIntosh, W. Li, Y.-B. Cheng, T. P. White, K. Weber and K. Catchpole, *Advanced Energy Materials*, 2017, **7**, 1700228.
59. J. Werner, L. Barraud, A. Walter, M. Bräuninger, F. Sahli, D. Sacchetto, N. Tétreault, B. Paviet-Salomon, S.-J. Moon, C. Allebé, M. Despeisse, S. Nicolay, S. De Wolf, B. Niesen and C. Ballif, *ACS Energy Letters*, 2016, **1**, 474-480.
60. A. Guchhait, H. A. Dewi, S. W. Leow, H. Wang, G. Han, F. B. Suhaimi, S. Mhaisalkar, L. H. Wong and N. Mathews, *ACS Energy Letters*, 2017, **2**, 807-812.
61. H. Shen, T. Duong, J. Peng, D. Jacobs, N. Wu, J. Gong, Y. Wu, S. K. Karuturi, X. Fu, K. Weber, X. Xiao, T. P. White and K. Catchpole, *Energy & Environmental Science*, 2018, **11**, 394-406.
62. D. H. Kim, C. P. Muzzillo, J. Tong, A. F. Palmstrom, B. W. Larson, C. Choi, S. P. Harvey, S. Glynn, J. B. Whitaker, F. Zhang, Z. Li, H. Lu, M. F. A. M. van Hest, J. J. Berry, L. M. Mansfield, Y. Huang, Y. Yan and K. Zhu, *Joule*, 2019, **3**, 1734-1745.
63. M. Jošt, E. Köhnen, A. B. Morales-Vilches, B. Lipovšek, K. Jäger, B. Macco, A. Al-Ashouri, J. Krč, L. Korte, B. Rech, R. Schlatmann, M. Topič, B. Stannowski and S. Albrecht, *Energy & Environmental Science*, 2018, **11**, 3511-3523.
64. K. A. Bush, S. Manzoor, K. Frohna, Z. J. Yu, J. A. Raiford, A. F. Palmstrom, H.-P. Wang, R. Prasanna, S. F. Bent, Z. C. Holman and M. D. McGehee, *ACS Energy Letters*, 2018, **3**, 2173-2180.

65. B. Chen, Z. Yu, K. Liu, X. Zheng, Y. Liu, J. Shi, D. Spronk, P. N. Rudd, Z. Holman and J. Huang, *Joule*, 2019, **3**, 177-190.
66. T. Todorov, T. Gershon, O. Gunawan, Y. S. Lee, C. Sturdevant, L.-Y. Chang and S. Guha, *Advanced Energy Materials*, 2015, **5**, 1500799.
67. Z. Yang, Z. Yu, H. Wei, X. Xiao, Z. Ni, B. Chen, Y. Deng, S. N. Habisreutinger, X. Chen, K. Wang, J. Zhao, P. N. Rudd, J. J. Berry, M. C. Beard and J. Huang, *Nat Commun*, 2019, **10**, 4498.
68. P. Jackson, R. Wuerz, D. Hariskos, E. Lotter, W. Witte and M. Powalla, *physica status solidi (RRL) – Rapid Research Letters*, 2016, **10**, 583-586.
